# Supplementary material for: One-time sintering process to synthesize ZrO2-coated LiMn2O4 materials for lithium-ion batteries
Source: Royal Society of Chemistry journal article supplement (doi:10.1039/c8ra01421c), 2018-01-01
Supplement: c8ra01421c1.pdf [file c8ra01421c1.pdf]

## Supporting information

### One-time sintering process to synthesize ZrO<sub>2</sub>-coated LiMn<sub>2</sub>O<sub>4</sub> materials for lithium-ion batteries

Gang Li<sup>a</sup>, Xu Chen<sup>a</sup>, Yafei Liu<sup>b</sup>, Yanbin Chen<sup>b</sup> and Wensheng Yang<sup>a\*</sup>

<sup>a</sup> *State Key Laboratory of Chemical Resource Engineering, Beijing University of Chemical Technology, Beijing 100029, P.R. China*

<sup>b</sup> *Beijing Easpring Material Technology Co., Ltd., Beijing 100160, P. R. China*

*Corresponding author: W. Yang, yangws@mail.buct.edu.cn*

Tel.: +86 10 64435271; fax: +86 10 64425385

## 1. SEM and particle size distribution characterizations of raw materials

$\text{Mn}_3\text{O}_4$  (Industrial grade, Nanjing Tianyuan Magnetic Material Co., Ltd.) and  $\text{ZrO}_2$  (Industrial grade, Xuan Cheng Jing Rui New Material Co., Ltd.) were used as the raw materials without any further treatment.

Particle size distribution of  $\text{Mn}_3\text{O}_4$  and  $\text{ZrO}_2$  was measured using the Mastersizer 2000 system. As illustrated in Fig. S1, the average particle size (D50) of  $\text{Mn}_3\text{O}_4$  and  $\text{ZrO}_2$  are 10.12 and 1.627  $\mu\text{m}$ , respectively. Due to the aggregation of nano-sized  $\text{ZrO}_2$ , the measured value is much larger than the actual value.

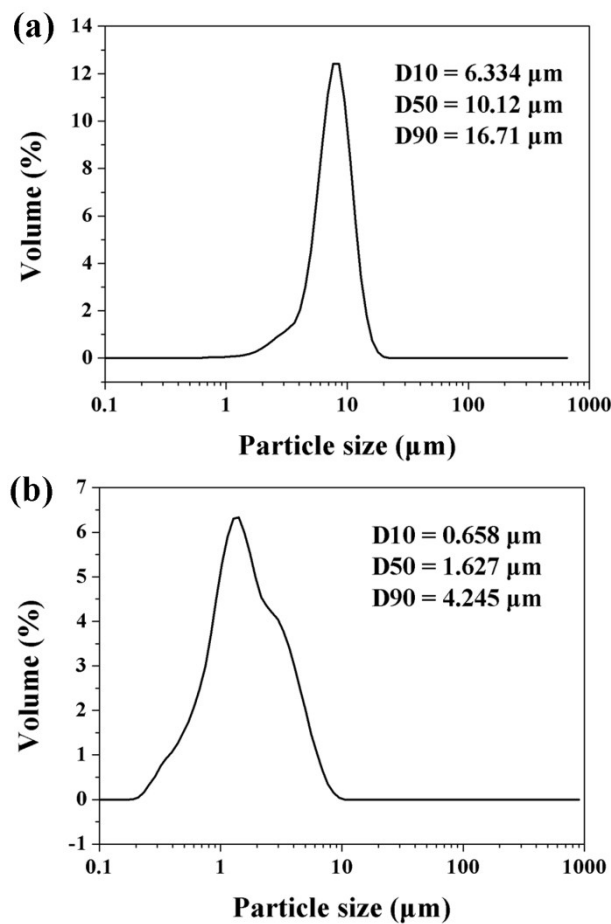

**Fig. S1.** Particle size distributions of (a)  $\text{Mn}_3\text{O}_4$  and (b)  $\text{ZrO}_2$ .

SEM images of the raw materials of  $\text{Mn}_3\text{O}_4$  and  $\text{ZrO}_2$  were illustrated in Fig. S2. It can be seen from Fig. S2 that  $\text{Mn}_3\text{O}_4$  particles have spherical-like appearance and are composed of the octahedral primary particles with the particle size ranging from 100 to 200 nm. Nano-sized  $\text{ZrO}_2$  particles with the primary particle size of 30~40 nm aggregate into irregular secondary particles.

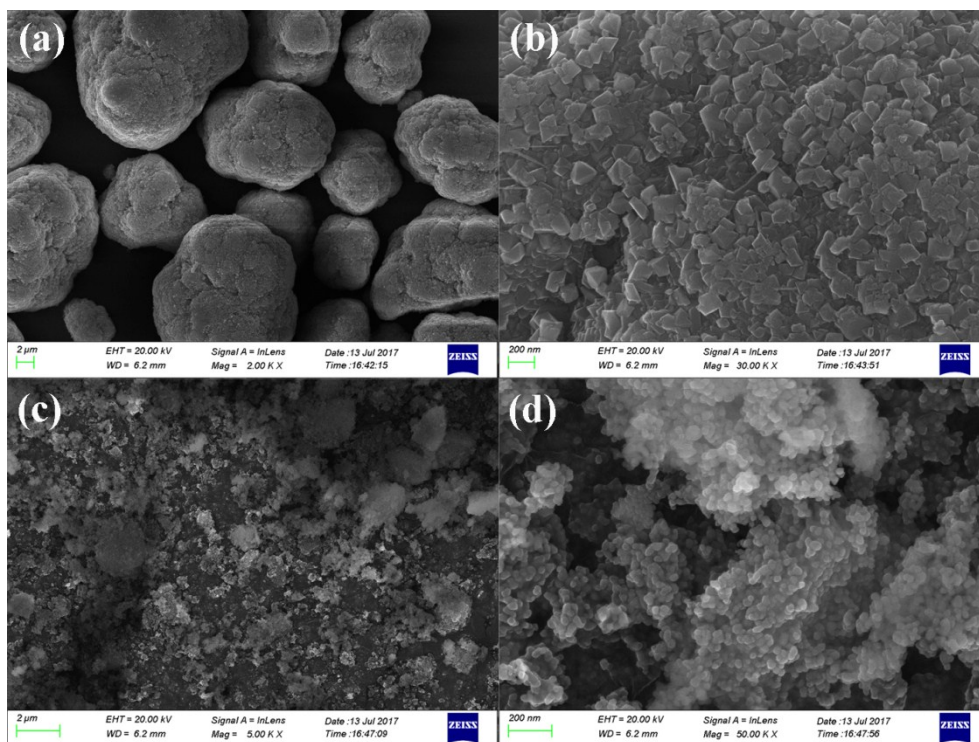

**Fig. S2.** SEM images of (a, b) Mn<sub>3</sub>O<sub>4</sub> and (c, d) ZrO<sub>2</sub>.

## 2. Material preparation

### 2.1. Synthesis of LMO@ZrO<sub>2</sub>

Stoichiometric amounts of industrial grade Mn<sub>3</sub>O<sub>4</sub>, battery grade Li<sub>2</sub>CO<sub>3</sub>, and nano-sized ZrO<sub>2</sub> (Li:Mn=1.05:2) are accurately weighted and then ball-milled at the same time for 3 h (the adding amount of ZrO<sub>2</sub> is 3.56 wt.% of the weight of the Mn<sub>3</sub>O<sub>4</sub> precursor). The mass ratio of the agate balls to the raw materials is 1:1, and the rotational speed of the planetary ball mill is 400 rpm. The obtained mixture was added into alumina crucible, then preheated at 550 °C for 5 h and calcined at 800 °C for 20 h in O<sub>2</sub> atmosphere. Both of the heating and cooling rates are 3 °C·min<sup>-1</sup>. The calcined samples were crushed down and sifted through a sieve of 325 meshes, thus the final products were obtained. The as-synthesized material is denoted as LMO@ZrO<sub>2</sub>.

### 2.2. Synthesis of 3 wt.% ZrO<sub>2</sub>-coated LiMn<sub>2</sub>O<sub>4</sub> material by dry coating method

3 wt.% ZrO<sub>2</sub>-coated LiMn<sub>2</sub>O<sub>4</sub> material was synthesized by the conventional dry coating method. LiMn<sub>2</sub>O<sub>4</sub> was firstly synthesized by sintering the mixture of Mn<sub>3</sub>O<sub>4</sub> and Li<sub>2</sub>CO<sub>3</sub> (Li:Mn=1.05:2, molar ratio) at 800 °C for 20 h. Then, LiMn<sub>2</sub>O<sub>4</sub> and nano-sized ZrO<sub>2</sub> materials were added into the ball-milling jar, ball-milled for 1 h, and followed by re-calcination at 600 °C for 5 h.

### 2.3. Synthesis of different amounts of SiO<sub>2</sub>-coated LiMn<sub>2</sub>O<sub>4</sub> materials

Industrial grade Mn<sub>3</sub>O<sub>4</sub> and nano-sized SiO<sub>2</sub> were firstly weighed and ball-milled for 1 h, and then the stoichiometric amount of battery grade Li<sub>2</sub>CO<sub>3</sub> (Li:Mn=1.05:2, molar ratio) was added to the above mixed materials and further ball-milled for 3 h. The mixture was preheated at 550 °C for 5 h and calcined at 800 °C for 20 h in O<sub>2</sub> atmosphere. Both of the heating and cooling rates are 3 °C·min<sup>-1</sup>. Note that the adding amount of SiO<sub>2</sub> was calculated based on the weight of the final LiMn<sub>2</sub>O<sub>4</sub> material. Therefore, in order to synthesize 1, 3, and 5 wt.% SiO<sub>2</sub>-coated LiMn<sub>2</sub>O<sub>4</sub>, the adding amount of SiO<sub>2</sub> is 1.19, 3.56, and 5.93 wt.% of the weight of the Mn<sub>3</sub>O<sub>4</sub> precursor.

### 2.4. Synthesis of different amounts of TiO<sub>2</sub>-coated LiMn<sub>2</sub>O<sub>4</sub> materials

Industrial grade Mn<sub>3</sub>O<sub>4</sub> and nano-sized TiO<sub>2</sub> were firstly weighed and ball-milled for 1 h, and then the stoichiometric amount of battery grade Li<sub>2</sub>CO<sub>3</sub> (Li:Mn=1.05:2, molar ratio) was

added to the above mixed materials and further ball-milled for 3 h. The mixture was preheated at 550 °C for 5 h and calcined at 800 °C for 20 h in O<sub>2</sub> atmosphere, then slowly cooled to 300 °C at a rate of 3 °C·min<sup>-1</sup>. Note that the adding amount of TiO<sub>2</sub> was calculated based on the weight of the final LiMn<sub>2</sub>O<sub>4</sub> material. Therefore, in order to synthesize 1, 3, and 5 wt.% TiO<sub>2</sub>-coated LiMn<sub>2</sub>O<sub>4</sub>, the adding amount of TiO<sub>2</sub> is 1.19, 3.56, and 5.93 wt.% of the weight of the Mn<sub>3</sub>O<sub>4</sub> precursor.

### 3. The theoretical calculation of the coating thickness

The calculation model for the coating thickness on the particle surface of  $\text{LiMn}_2\text{O}_4$  is shown in Fig. S3.  $D$  is the average particle size of spherical  $\text{LiMn}_2\text{O}_4$  materials, and  $d(\text{ZrO}_2)$  is the coating thickness of  $\text{ZrO}_2$ .

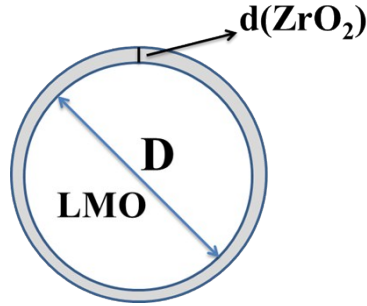

**Fig. S3** The calculation model for the coating thickness of  $\text{ZrO}_2$  on the particle surface of  $\text{LiMn}_2\text{O}_4$ .

Now, we define the volume, mass, and surface area of a single spherical  $\text{LiMn}_2\text{O}_4$  as  $V(\text{SLMO})$ ,  $m(\text{SLMO})$ , and  $S(\text{SLMO})$ , respectively. (1 wt.%  $\text{ZrO}_2$ -coated  $\text{LiMn}_2\text{O}_4$  as an example)

The true densities of  $\text{LiMn}_2\text{O}_4$  and  $\text{ZrO}_2$  are  $4.28$  and  $5.85 \text{ g}\cdot\text{cm}^{-3}$ , respectively. The average particle size of  $\text{LiMn}_2\text{O}_4$  is  $\sim 10 \mu\text{m}$ .

$$V(\text{SLMO}) = \frac{4\pi r^3}{3} = \frac{4 \times 3.14 \times 5^3}{3} = 523.3 \text{ } (\mu\text{m}^3)$$

$$S(\text{SLMO}) = \pi D^2 = 3.14 \times 10^2 = 314 \text{ } \mu\text{m}^2$$

$$m(\text{SLMO}) = \rho V = 4.28 \times 10^{-12} \times 523.3 = 2.24 \times 10^{-9} \text{ (g)}$$

$$m(\text{ZrO}_2) = 2.24 \times 10^{-9} \times 1\% = 2.24 \times 10^{-11} \text{ (g)}$$

Because the coating thickness is very small, so the volume of  $\text{ZrO}_2$  can be calculated as below:

$$V(\text{ZrO}_2) = S(\text{SLMO}) \cdot d(\text{ZrO}_2)$$

$$\text{So, } m(\text{ZrO}_2) = S(\text{SLMO}) \cdot d(\text{ZrO}_2) \cdot \rho(\text{ZrO}_2)$$

$$= 2.24 \times 10^{-11} \div (3.14 \times 10^2 \times 10^6) \div (5.85 \times 10^{21})$$

$$= 12.2 \text{ (nm)}$$

Based on the above formula, the theoretical coating thickness of 1, 3, and 5 wt.%  $\text{ZrO}_2$ -coated  $\text{LiMn}_2\text{O}_4$  materials is 12.2, 36.6, and 61.0 nm, respectively.

#### 4. Effect of the blending method on the coating uniformity of the final materials

SEM images of LMO@ZrO<sub>2</sub> are shown in Fig. S4(a, b). It can be seen from Fig. S4(a, b) that there are very small amount of ZrO<sub>2</sub> particles on the surface of LMO@ZrO<sub>2</sub> particles. The reason is that three raw materials are ball-milled at the same time, which makes a great number of ZrO<sub>2</sub> particles attached to the surface of Li<sub>2</sub>CO<sub>3</sub> particles. Therefore, even though Li<sub>2</sub>CO<sub>3</sub> would react with Mn<sub>3</sub>O<sub>4</sub> to form LiMn<sub>2</sub>O<sub>4</sub> after being heat-treated at 800 °C for 20 h, the ZrO<sub>2</sub> on the surface of Li<sub>2</sub>CO<sub>3</sub> particles can't be coated onto the surface of the final LiMn<sub>2</sub>O<sub>4</sub> particles again. So, the coating uniformity of LMO@ZrO<sub>2</sub> is very poor. By contrast, as illustrated in Fig. S4(c, d), using the two-step mixing method, the coating layer of 3 wt.% ZrO<sub>2</sub>-coated LiMn<sub>2</sub>O<sub>4</sub> synthesized via the one-time sintering process is very uniform. This is because the Mn<sub>3</sub>O<sub>4</sub> precursor is coated with ZrO<sub>2</sub> beforehand, which can guarantee that ZrO<sub>2</sub> particles would not be coated on the surface of Li<sub>2</sub>CO<sub>3</sub> particles or exist alone. Thus, a great majority of ZrO<sub>2</sub> particles can be coated on the final LiMn<sub>2</sub>O<sub>4</sub> particles after high-temperature calcination.

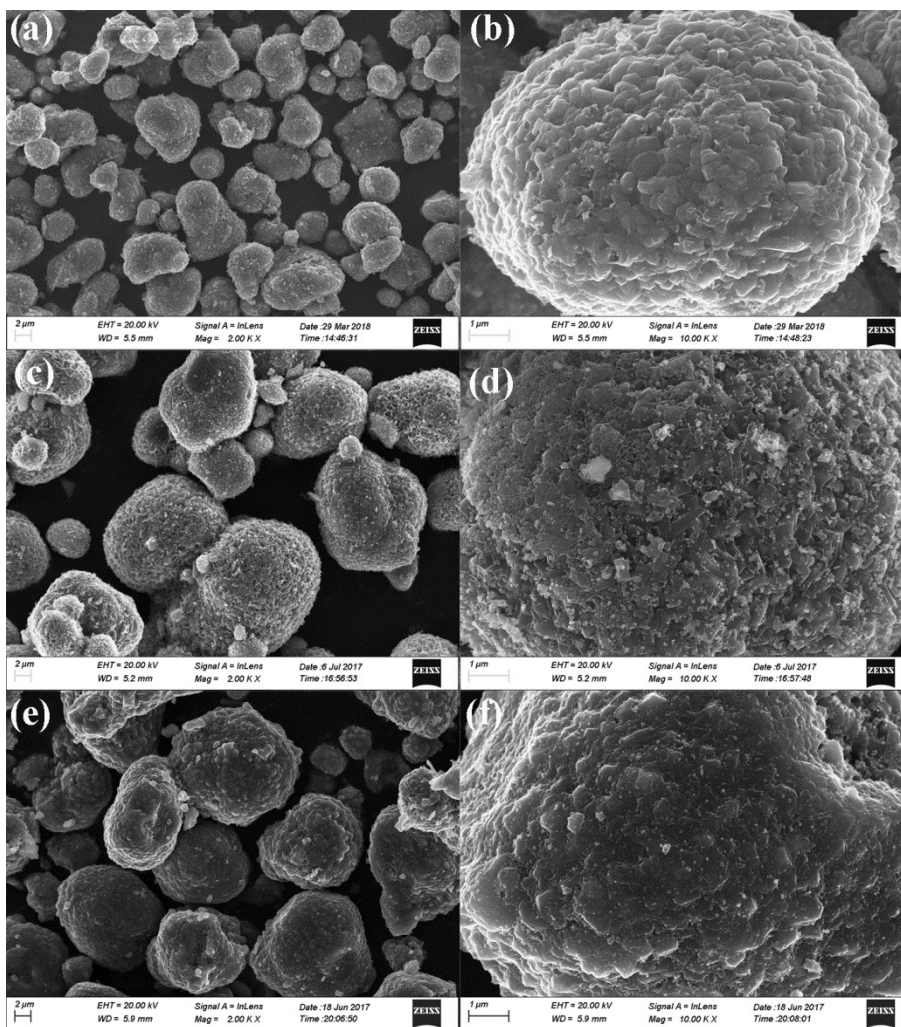

**Fig. S4.** SEM images of (a, b) LMO@ZrO<sub>2</sub> material, (c, d) 3 ZrO<sub>2</sub>-coated LiMn<sub>2</sub>O<sub>4</sub> synthesized via one-time sintering process, and (e, f) 3 ZrO<sub>2</sub>-coated LiMn<sub>2</sub>O<sub>4</sub> synthesized by the conventional dry coating method.

The cyclic performances of the pristine LiMn<sub>2</sub>O<sub>4</sub> and 3 wt.% ZrO<sub>2</sub>-coated LiMn<sub>2</sub>O<sub>4</sub> materials synthesized by the one-time sintering process and the conventional dry coating process are investigated at 25 °C and 55 °C. Their electrochemical properties are shown in Fig. S5 and Table S1. From Table S1, both of the room-temperature (RT) and high-temperature (HT) cyclic performance for 3 wt.% ZrO<sub>2</sub>-coated LiMn<sub>2</sub>O<sub>4</sub> synthesized by two different coating methods are greatly improved. In contrast, the initial discharge capacity of the sample synthesized by one-time sintering process is slightly lower than that of the sample synthesized by the conventional coating method, but it is opposite as to the cyclic performance. The main reasons are as follows: For the one-time sintering coating method, a small portion of Zr ions diffuse into the inner part of LiMn<sub>2</sub>O<sub>4</sub> particles, thus the electrochemical active Mn<sup>3+</sup> content is reduced and the spinel structure stabilization is increased. For the conventional coating



method, due to the relatively lower sintering temperature of 600 °C, ZrO<sub>2</sub> only plays a role of coating effect.

In summary, the one-time sintering process to synthesize ZrO<sub>2</sub>-coated LiMn<sub>2</sub>O<sub>4</sub> can exhibit a similar electrochemical performance with the conventional coating method.

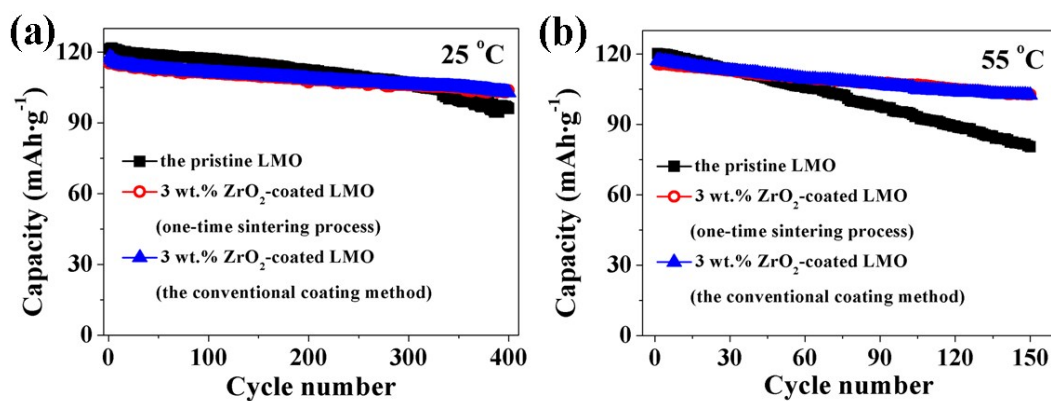

**Fig. S5.** Cyclic performance of the pristine LiMn<sub>2</sub>O<sub>4</sub> and 3 wt.% ZrO<sub>2</sub>-coated LiMn<sub>2</sub>O<sub>4</sub> synthesized by one-time sintering process and the conventional coating method.

**Table S1.** The electrochemical properties of the pristine LiMn<sub>2</sub>O<sub>4</sub> (sample-1) and 3 wt.% ZrO<sub>2</sub>-coated LiMn<sub>2</sub>O<sub>4</sub> synthesized by one-time sintering process (sample-2) and the conventional coating method (sample-3).

| Sample   | 25 °C                                      |                                             | 55 °C                                      |                                             |
|----------|--------------------------------------------|---------------------------------------------|--------------------------------------------|---------------------------------------------|
|          | Initial capacity<br>(mAh·g <sup>-1</sup> ) | 400 <sup>th</sup> capacity<br>retention (%) | Initial capacity<br>(mAh·g <sup>-1</sup> ) | 150 <sup>th</sup> capacity<br>retention (%) |
| sample-1 | 121.3                                      | 79.2                                        | 121.5                                      | 67.0                                        |
| sample-2 | 115.2                                      | 90.1                                        | 115.7                                      | 88.9                                        |
| sample-3 | 117.9                                      | 87.3                                        | 117.8                                      | 87.5                                        |

## **5. Effect of the coating method on the coating uniformity of the final materials**

In order to compare the coating effect between the one-time sintering method and the conventional dry coating method, 3 wt.% ZrO<sub>2</sub>-coated LiMn<sub>2</sub>O<sub>4</sub> materials via the above two coating methods were synthesized, respectively. It can be seen from Fig. S4(d, f) that both of the particle surfaces are coated by many small ZrO<sub>2</sub> particles ranging from 30~40 nm, and the coating uniformity of the one-time sintering coating method is similar to that of the conventional coating method.

## **6. The morphologies of different amounts of SiO<sub>2</sub>- and TiO<sub>2</sub>-coated LiMn<sub>2</sub>O<sub>4</sub>**

The sintering products of different amounts of SiO<sub>2</sub>-coated Mn<sub>3</sub>O<sub>4</sub>&Li<sub>2</sub>CO<sub>3</sub> and TiO<sub>2</sub>-coated Mn<sub>3</sub>O<sub>4</sub>&Li<sub>2</sub>CO<sub>3</sub> mixtures calcined at 550 °C and 800 °C were characterized using SEM. Fig. S6 shows the SEM images of the pristine LiMn<sub>2</sub>O<sub>4</sub> and 1, 3, 5 wt.% SiO<sub>2</sub>-coated LiMn<sub>2</sub>O<sub>4</sub> materials calcined at 550 °C and 800 °C. When the sintering temperature is 550 °C, it is clearly seen that there are many coating materials on the surface of LiMn<sub>2</sub>O<sub>4</sub> particles. Moreover, the coating integrity of 1 wt.% coating amount is inferior to that of 3 and 5 wt.% coating amount. When the sintering temperature increases to 800 °C, the coating layers completely disappear, no matter the coating amount is 1, 3, or 5 wt.%. It demonstrates that Si has diffused into the bulk crystals of LiMn<sub>2</sub>O<sub>4</sub> at 800 °C. As illustrated in Fig. S7, the same results for different amounts of TiO<sub>2</sub>-coated LiMn<sub>2</sub>O<sub>4</sub> are also obtained.

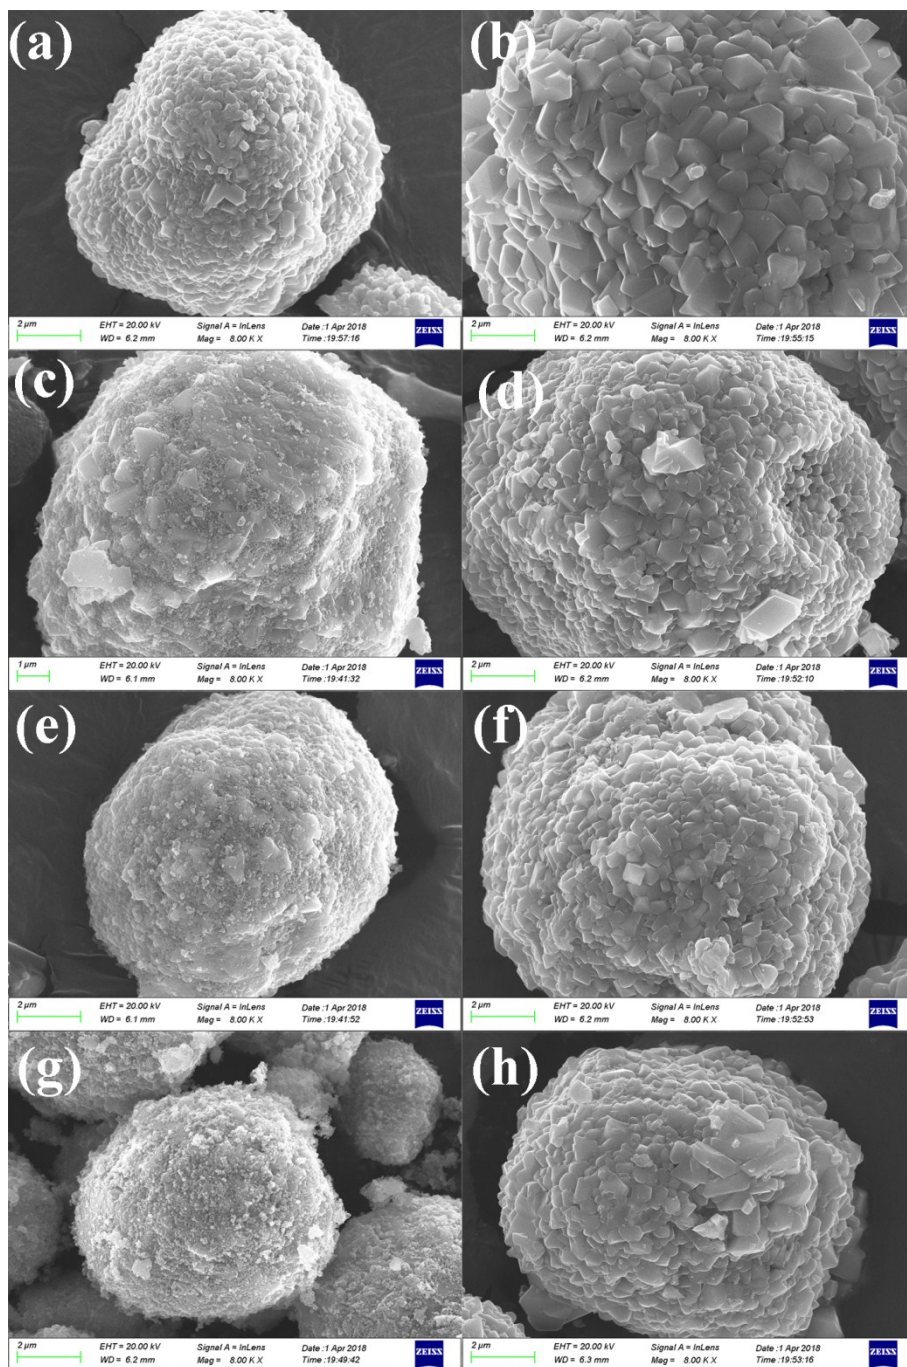

**Fig. S6.** SEM images of the sintering products of 0, 1.19, 3.56 and 5.93 wt.% SiO<sub>2</sub>-coated Mn<sub>3</sub>O<sub>4</sub>@Li<sub>2</sub>CO<sub>3</sub> mixtures calcined at different temperatures: (a, c, e, g) 550 °C; (b, d, f, h) 800 °C.

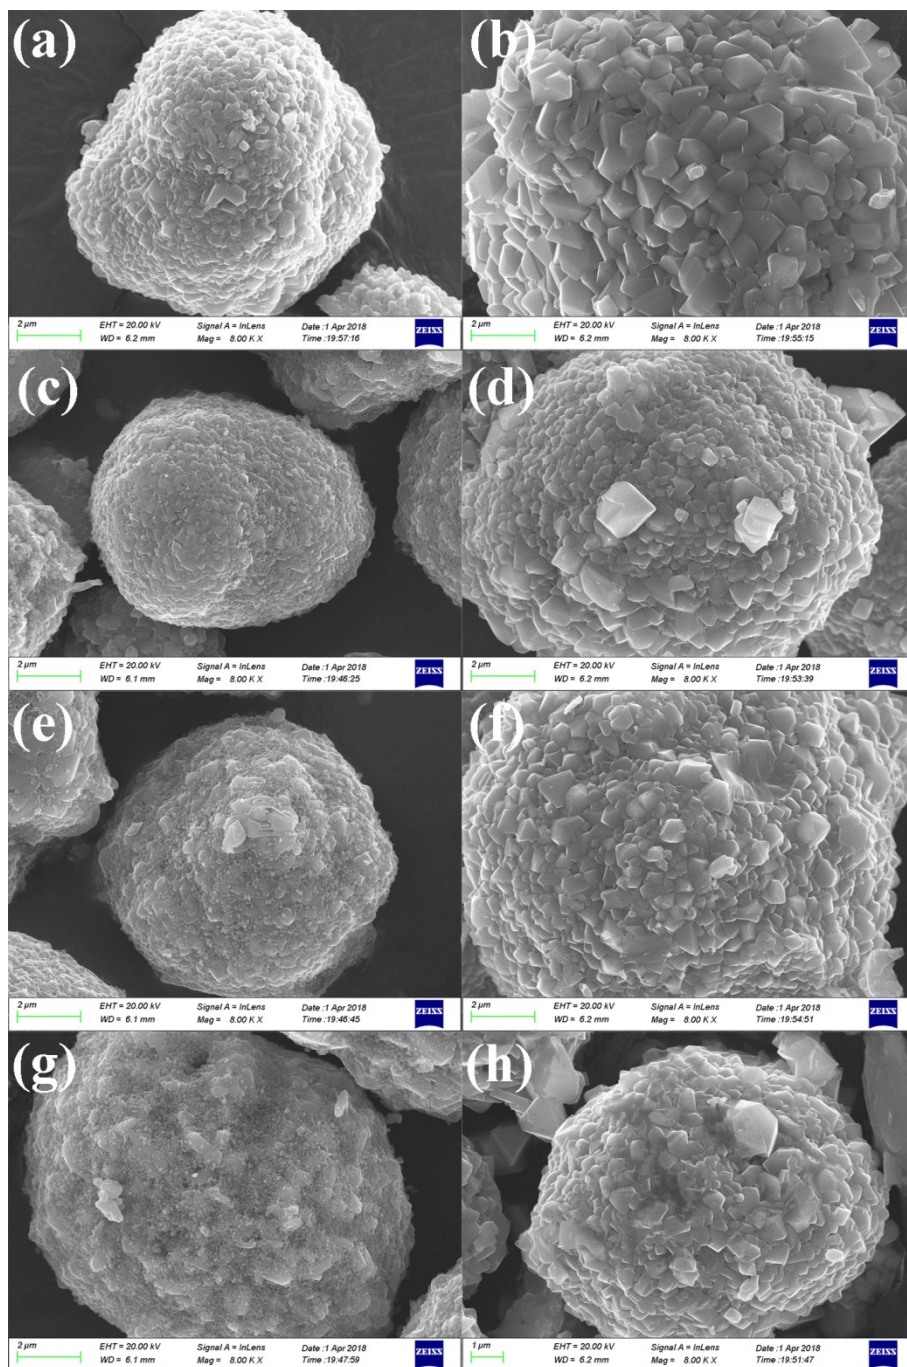

**Fig. S7.** SEM images of the sintering products of 0, 1.19, 3.56 and 5.93 wt.% TiO<sub>2</sub>-coated Mn<sub>3</sub>O<sub>4</sub>@Li<sub>2</sub>CO<sub>3</sub> mixtures calcined at different temperatures: (a, c, e, g) 550 °C; (b, d, f, h) 800 °C.

## 7. Crystal structures of 3 wt.% SiO<sub>2</sub>-coated LiMn<sub>2</sub>O<sub>4</sub> and 3 wt.% TiO<sub>2</sub>-coated LiMn<sub>2</sub>O<sub>4</sub> calcined at 550 °C

XRD was employed to measure the crystal structures of the sintering products of 3.56 wt.% SiO<sub>2</sub>-coated Mn<sub>3</sub>O<sub>4</sub>&Li<sub>2</sub>CO<sub>3</sub> and 3.56 wt.% TiO<sub>2</sub>-coated Mn<sub>3</sub>O<sub>4</sub>&Li<sub>2</sub>CO<sub>3</sub> heat-treated at 550 °C.

As illustrated in Fig. S8a, the major diffraction peaks of the samples indexed to the spinel LiMn<sub>2</sub>O<sub>4</sub> are observed, but the diffraction peaks indexed to SiO<sub>2</sub> and Mn<sub>2</sub>O<sub>3</sub> are also observed, indicating that the SiO<sub>2</sub> coating layer is still maintained on the surface of LiMn<sub>2</sub>O<sub>4</sub> particles, which can be proven from the SEM image in Fig. S4e. On the other hand, there are still some Mn<sub>3</sub>O<sub>4</sub> unreacting with Li<sub>2</sub>CO<sub>3</sub> to form LiMn<sub>2</sub>O<sub>4</sub>. What needs to be explained is that the unreacting Mn<sub>3</sub>O<sub>4</sub> would be transformed to Mn<sub>2</sub>O<sub>3</sub> in O<sub>2</sub> at 550 °C.

The same XRD result is also obtained from 3 wt.% TiO<sub>2</sub>-coated LiMn<sub>2</sub>O<sub>4</sub> materials calcined at 550 °C. As illustrated in Fig. S8b, the diffraction peak indexed to TiO<sub>2</sub> can be observed, indicating that the TiO<sub>2</sub> coating layer is still maintained on the surface of LiMn<sub>2</sub>O<sub>4</sub> materials, which is well agreement with the result obtained in Fig. S6e.

The above results demonstrate that the diffusing rates of Si and Ti ions into the crystal lattice of LiMn<sub>2</sub>O<sub>4</sub> are very slow at 550 °C, so that the SiO<sub>2</sub> and TiO<sub>2</sub> coating layers can be maintained on the surface of LiMn<sub>2</sub>O<sub>4</sub> particles.

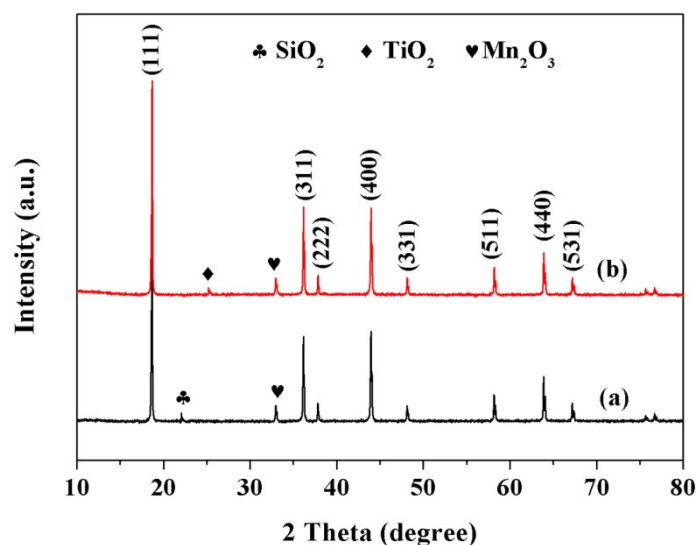

**Fig. S8.** XRD patterns of the sintering products of (a) 3.56 wt.% SiO<sub>2</sub>-coated Mn<sub>3</sub>O<sub>4</sub>@Li<sub>2</sub>CO<sub>3</sub> and (b) 3.56 wt.% TiO<sub>2</sub>-coated Mn<sub>3</sub>O<sub>4</sub>@Li<sub>2</sub>CO<sub>3</sub> calcined at 550 °C.

## 8. Crystal structures of different amounts of SiO<sub>2</sub>- and TiO<sub>2</sub>-coated LiMn<sub>2</sub>O<sub>4</sub> calcined at 800 °C

XRD was employed to investigate the crystal structures of the sintering products of SiO<sub>2</sub>-coated Mn<sub>3</sub>O<sub>4</sub>&Li<sub>2</sub>CO<sub>3</sub> and TiO<sub>2</sub>-coated Mn<sub>3</sub>O<sub>4</sub>&Li<sub>2</sub>CO<sub>3</sub> heat-treated at 800 °C for 20 h.

As illustrated in Fig. S9a, all the diffraction peaks can be indexed to LiMn<sub>2</sub>O<sub>4</sub> (JCPDF file No. 35-0782) with the spinel structure. Additionally, there is no diffraction peaks indexed to SiO<sub>2</sub> observed, indicating that Si has diffused into the bulk crystal to form LiMn<sub>2-x</sub>Si<sub>x</sub>O<sub>4</sub> phase. Fig. S9b shows the variation trend of lattice constant of the LiMn<sub>2-x</sub>Si<sub>x</sub>O<sub>4</sub> samples. In can be seen from Fig. S9b that the crystal lattice constant presents a trend of gradual increase with the increasing of Si-doping content. It is very interesting to find the unusual result since the ionic radius of Si<sup>4+</sup> ( $r = 0.40 \text{ \AA}$ ) is smaller than that of Mn<sup>4+</sup> ( $r = 0.53 \text{ \AA}$ ) in an octahedral site. According to the existing literatures (J. Power Sources, 2012, 216: 482-488; J. Mater. Chem. A, 2013, 1: 10857-10862.), the addition of Si<sup>4+</sup> ions can increase the length of Mn-O bonding, angle of O-Mn-O and size of MnO<sub>6</sub> octahedra in the Si-doped LiMn<sub>2</sub>O<sub>4</sub> samples, which leads to the more expanded and regular MnO<sub>6</sub> octahedra. Therefore, it is not difficult to understand the increase of the crystal lattice constant.

Fig. S9c shows the XRD patterns of the sintering products of 0, 1.19, 3.56 and 5.93 wt.% TiO<sub>2</sub>-coated Mn<sub>3</sub>O<sub>4</sub>@Li<sub>2</sub>CO<sub>3</sub> mixtures calcined at 800 °C for 20 h. All diffraction peaks can be indexed to LiMn<sub>2</sub>O<sub>4</sub> (JCPDF file No. 35-0782) with the spinel structure without any impurity phase, which indicates that Ti has substituted partial Mn in the spinel structure. Simultaneously, as seen from Fig. S8d, the lattice constant increases gradually with Ti content increasing because of the expanded crystal cell of LiMn<sub>2</sub>O<sub>4</sub>, which is due to the replacement of Mn<sup>4+</sup> ( $r = 0.53 \text{ \AA}$ ) with a larger Ti<sup>4+</sup> ( $r = 0.605 \text{ \AA}$ ) on octahedral sites and the decrease in the manganese average oxidation state.

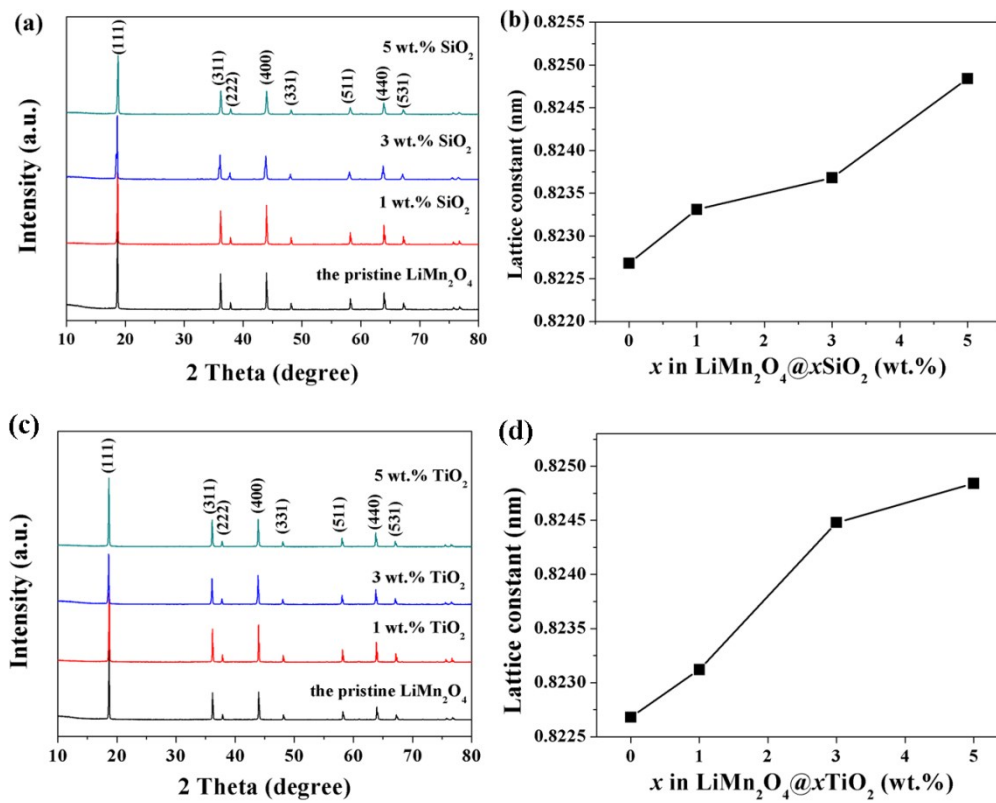

**Fig. S9** (a) XRD patterns and (b) the lattice constant of the sintering products of 0, 1.19, 3.56 and 5.93 wt.% SiO<sub>2</sub>-coated Mn<sub>3</sub>O<sub>4</sub>@Li<sub>2</sub>CO<sub>3</sub> mixtures calcined at 800 °C for 20 h; (c) XRD patterns and (d) the lattice constant of the sintering products of 0, 1.19, 3.56 and 5.93 wt.% TiO<sub>2</sub>-coated Mn<sub>3</sub>O<sub>4</sub>@Li<sub>2</sub>CO<sub>3</sub> mixtures calcined at 800 °C for 20 h.

## 9. Effect of the sintering temperature and time on crystal structures of the sintering products

Influence of sintering temperature and time on the structure and performance of these materials was investigated in detail. Fig. S10 shows XRD patterns of the sintering products of different amounts of  $ZrO_2$ -coated  $Mn_3O_4$  &  $Li_2CO_3$  calcined at different temperatures. When the sintering temperature is between 550 °C and 600 °C, the main diffraction peaks indexed to cubic spinel  $LiMn_2O_4$  can be easily observed, indicating that  $Li_2CO_3$  has reacted with  $Mn_3O_4$  to form  $LiMn_2O_4$ . However, the intensity of diffraction peaks attributed to  $LiMn_2O_4$  is low and the diffraction peaks indexed to  $Mn_2O_3$  can be observed, indicating that  $Li_2CO_3$  has not completely reacted with  $Mn_3O_4$ . Some unreacted  $Mn_3O_4$  are transformed into  $Mn_2O_3$ . When the sintering temperature is between 650 °C and 700 °C, the cubic spinel structure has been formed, but the intensity of diffraction peaks is low and half-peak width is big, which demonstrates that the spinel crystals are not well-ordered. When the sintering temperature is raised to 750~850 °C, the intensity of diffraction peaks becomes stronger with the temperature increasing. As to 3 wt.% and 5 wt.%  $ZrO_2$ -coated  $LiMn_2O_4$  materials, when the sintering temperature is between 550 °C and 850 °C, the diffraction peaks of  $ZrO_2$  can always be observed. Therefore, three conclusions can be obtained: 1)  $ZrO_2$  has not reacted with  $Li_2CO_3$  to form  $Li_2ZrO_3$ ; 2) Most of Zr ions have not diffused into the bulk crystal of  $LiMn_2O_4$ , so the  $ZrO_2$  coating layer can still be maintained even after long-term high-temperature heat-treatment; 3) As the temperature increases, the intensity of diffraction peaks indexed to  $ZrO_2$  becomes stronger, which probably shows that the  $ZrO_2$  coating layer becomes denser after high-temperature heat-treatment.

Fig. S11 shows the XRD patterns of 3 wt.%  $ZrO_2$ -coated  $LiMn_2O_4$  calcined at 800 °C for 20 h and 40 h, respectively. It can be seen from Fig. S10 that the main diffraction peaks of two samples can be indexed to cubic spinel  $LiMn_2O_4$  structure,  $Fd3m$  space group. Additionally, as the sintering time increases, the location of diffraction peaks of  $LiMn_2O_4$  changes little and the diffraction peaks attributed to  $ZrO_2$  can still be easily observed, indicating that the  $ZrO_2$  coating layer can still be maintained even after calcination at 800 °C for 40 h.

From XRD data, we have obtained that most of  $ZrO_2$  have not diffused into the inner part of  $LiMn_2O_4$  particles even after long-term high-temperature calcination. However, although the melting point of  $ZrO_2$  is high to 2700 °C, there are still some Zr ions diffusing into the



crystal lattice to form  $\text{LiMn}_{2-x}\text{Zr}_x\text{O}_4$  phase. This is because solid-state diffusion reaction still can take place even if the sintering temperature can't reach the melting point of the raw materials.

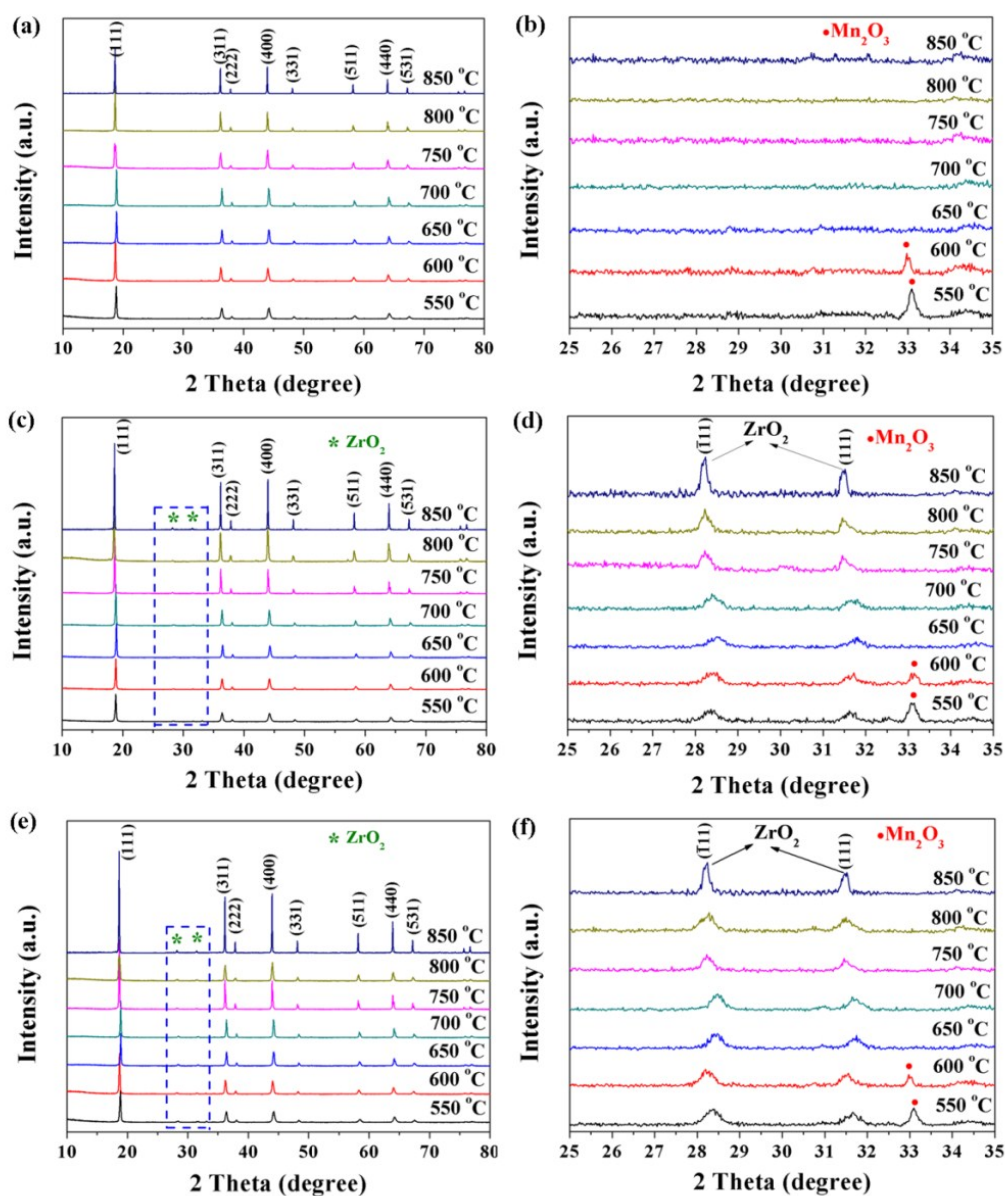

**Fig. S10.** XRD patterns of the sintering products of (a, b)  $\text{Mn}_3\text{O}_4$ & $\text{Li}_2\text{CO}_3$ , (c, d) 3.56 wt.%  $\text{ZrO}_2$ -coated  $\text{Mn}_3\text{O}_4$ & $\text{Li}_2\text{CO}_3$ , and (e, f) 5.93 wt.%  $\text{ZrO}_2$ -coated  $\text{Mn}_3\text{O}_4$ & $\text{Li}_2\text{CO}_3$  calcined at different temperatures.

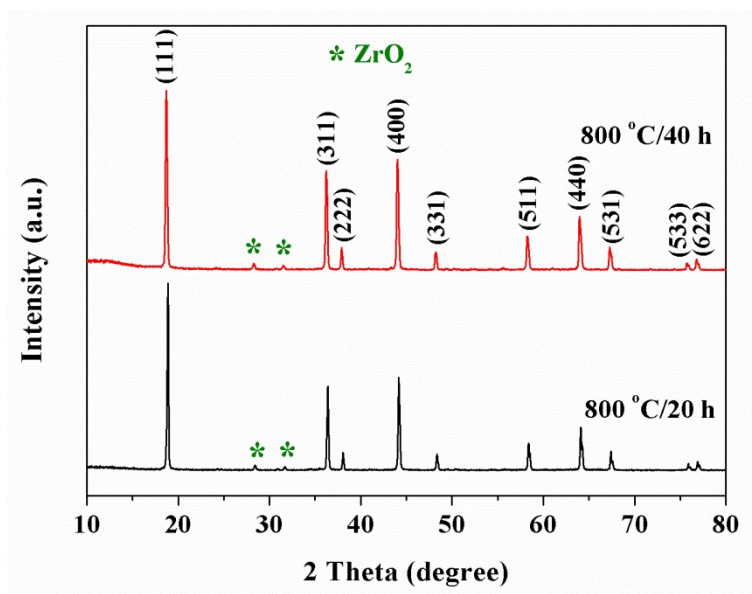

**Fig. S11.** XRD patterns of 3 wt.% ZrO<sub>2</sub>-coated LiMn<sub>2</sub>O<sub>4</sub> calcined at 800 °C for 20 h and 40 h, respectively.

Fig. S12 shows the cyclic performance of the pristine LiMn<sub>2</sub>O<sub>4</sub> materials calcined at different temperatures for 20 in O<sub>2</sub> atmosphere. The charge/discharge rate is 0.2 C (24 mA·g<sup>-1</sup>) for the first 4 cycles and 1 C (120 mA·g<sup>-1</sup>) for the following cycles. In the voltage range of 3.0~4.3 V (vs. Li<sup>+</sup>/Li), the initial specific discharge capacities of the LiMn<sub>2</sub>O<sub>4</sub> samples calcined at 750 °C, 800 °C, and 850 °C at 0.2 C are 119.8, 121.3, and 119.4 mAh·g<sup>-1</sup>, respectively. The 300<sup>th</sup> capacity retentions of LiMn<sub>2</sub>O<sub>4</sub> samples calcined at 750 °C and 800 °C are 81.4 and 88.0%, respectively. For the sample calcined at 850 °C, the discharge capacity drops rapidly in the charge-discharge processes with the 100<sup>th</sup> capacity retention of only 60.7%. From the above results, we can draw a conclusion that the optimal synthesizing temperature of LiMn<sub>2</sub>O<sub>4</sub> is 800 °C.

Fig. S13 shows the cyclic performance of LiMn<sub>2</sub>O<sub>4</sub> samples calcined at 800 °C for 20 h and 40 h. The initial specific discharge capacities of the samples calcined for 20 h and 40 h are 121.3 and 122.5 mAh·g<sup>-1</sup> with the 300<sup>th</sup> capacity retention of 88.0% and 86.6%, respectively. The above result shows that the discharge capacity slightly increases and the capacity retention slightly decreases with the sintering time increasing. The reason is probably that more Li<sup>+</sup> ions evaporate in the long-term high-temperature heat-treatment, resulting in the lower Li/Mn ratio, thus the discharge capacity slightly increases and the capacity retention slightly decreases.

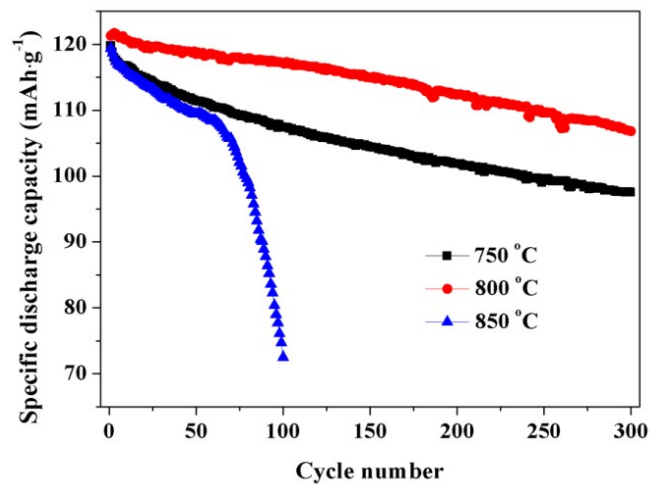

**Fig. S12.** Cyclic performance of  $\text{LiMn}_2\text{O}_4$  calcined at different temperatures for 20 h in  $\text{O}_2$  atmosphere.

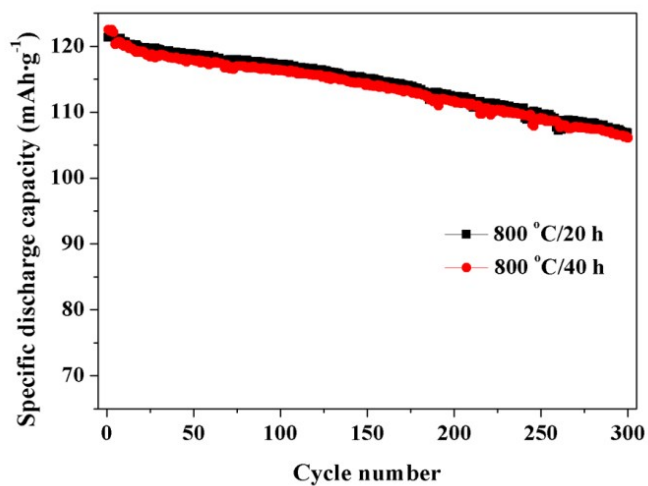

**Fig. S13.** Cyclic performance of  $\text{LiMn}_2\text{O}_4$  calcined at 800 °C for 20 h and 40 h in  $\text{O}_2$  atmosphere.

## 10. SEM and XRD characterizations of 3 wt.% ZrO<sub>2</sub>-coated LiMn<sub>2</sub>O<sub>4</sub> electrode post electrochemical testing

3 wt.% ZrO<sub>2</sub>-coated LiMn<sub>2</sub>O<sub>4</sub> electrode cycled for 150 cycles at 55 °C was characterized using SEM and XRD. It is obviously seen from Fig. S14 that there are many small particles with the particle size of 30~40 nm on the surface of LiMn<sub>2</sub>O<sub>4</sub> particle, which demonstrates that the coating layer still exists after electrochemical testing.

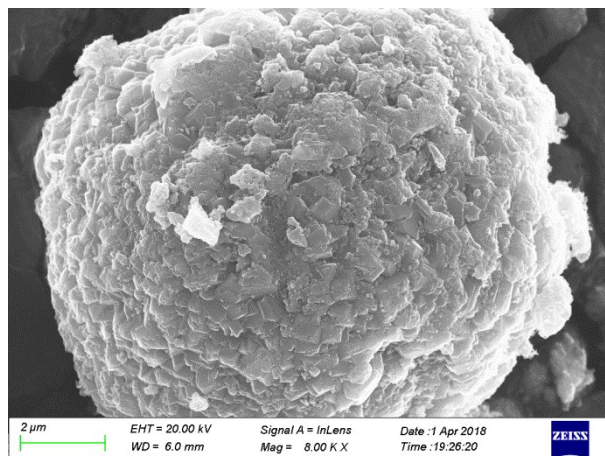

**Fig. S14.** SEM image of 3 wt.% ZrO<sub>2</sub>-coated LiMn<sub>2</sub>O<sub>4</sub> after 150 cycles at 55 °C.

Fig. S15 shows the XRD patterns of 3 wt.% ZrO<sub>2</sub> coated LiMn<sub>2</sub>O<sub>4</sub> electrode after 150 cycles at 55 °C. The major diffraction peaks are in good agreement with that obtained from JCPDF file No. 35-0782, indicating that the cubic spinel structure of LiMn<sub>2</sub>O<sub>4</sub> material is still maintained post electrochemical test. Additionally, the diffraction peaks located at 28.2 ° and 31.5 ° indexed to ZrO<sub>2</sub> can still be observed, which implies that the ZrO<sub>2</sub> coating layer does not disappear.

Based on the analysis of SEM and XRD data, we can conclude that the ZrO<sub>2</sub> coating layer on the surface of LiMn<sub>2</sub>O<sub>4</sub> particles is very stable to the volume changes brought by the long-term charge-discharge processes.

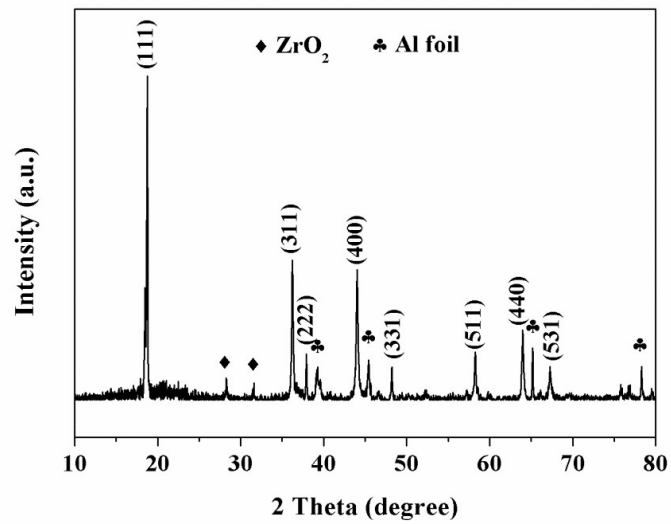

**Fig. S15.** XRD pattern of 3 wt.% ZrO<sub>2</sub>-coated LiMn<sub>2</sub>O<sub>4</sub> electrode after 150 cycles at 55 °C.
